# Supplementary material
Source: PubMed Central journal article supplement (PMC5560789)
Supplement: 1807FileS1.pdf [file 1807FileS1.pdf]

## Supplemental Figure Legends

**Figure S1: Synthetic-lethal interactions in DNA repair.** (A) The indicated parental strains were mated, sporulated and the spores microdissected onto YPD plates. Spore clones were photographed after 7 days at 30C. Microscopic examination of the *tdp1Δ wss1Δ* spore clones indicated that the spores had germinated and formed microcolonies of up to 50 cells. (B) The indicated parental strains were treated as in (A).

**Figure S2. Stability of Slx5 truncation mutants.** The WT *SLX5* ORF, or fragments corresponding to the indicated N- and or C- terminal truncations, were cloned downstream of the *GAL10* promoter in vector pRS425 (*LEU2/2μm/CEN*) and transformed into PSY3884. Following growth in galactose for 6 hours, yeast extracts were prepared, resolved by 10% SDS-PAGE and immunoblotted for Slx5. The blot was later reprobbed with antibody against Rfa1 as a loading control.

**Fig. S3: Suppressor mutations and the nibbled colony phenotype** **A.** PSY3497 (*tdp1Δ wss1Δ top1-Q668-STOP*) was crossed to NJY3292 (*tdp1Δ wss1Δ + pNJ7478*). Diploids were sporulated, microdissected vertically and allowed to grow for 4 days at 30°C. The *top1-Q668-STOP* mutants are circled. Red color indicates the presence of pNJ7478. **B.** Strains PSY3791-PSY3794 containing the indicated *SLX5* allele integrated at *LEU2* were crossed to wild-type strain JMY3104 and treated as in (A). The respective *slx5* mutants are circled. **C.** Strain PSY3884 (*slx5Δ*) was transformed with single-copy *CEN/ARS* plasmids containing either no insert or the indicated alleles of *SLX5*. Transformation plates were photographed after 4 days incubation at 30°C.

**Figure S4.** Amino acid sequence analysis of a variety of STUbLs from fungi and higher eukaryotes. Sequences are annotated as follows: lysine residues are represented by a blue **K** with yellow

highlighting, and arginines are indicated by a red **R**. In each protein, the longest aa sequence uninterrupted by a lysine is shaded in gray, and its length is presented at the top of the sequence in parentheses along with its percentage of the total protein. RING domains are underlined. Putative SIMs are highlighted in green.

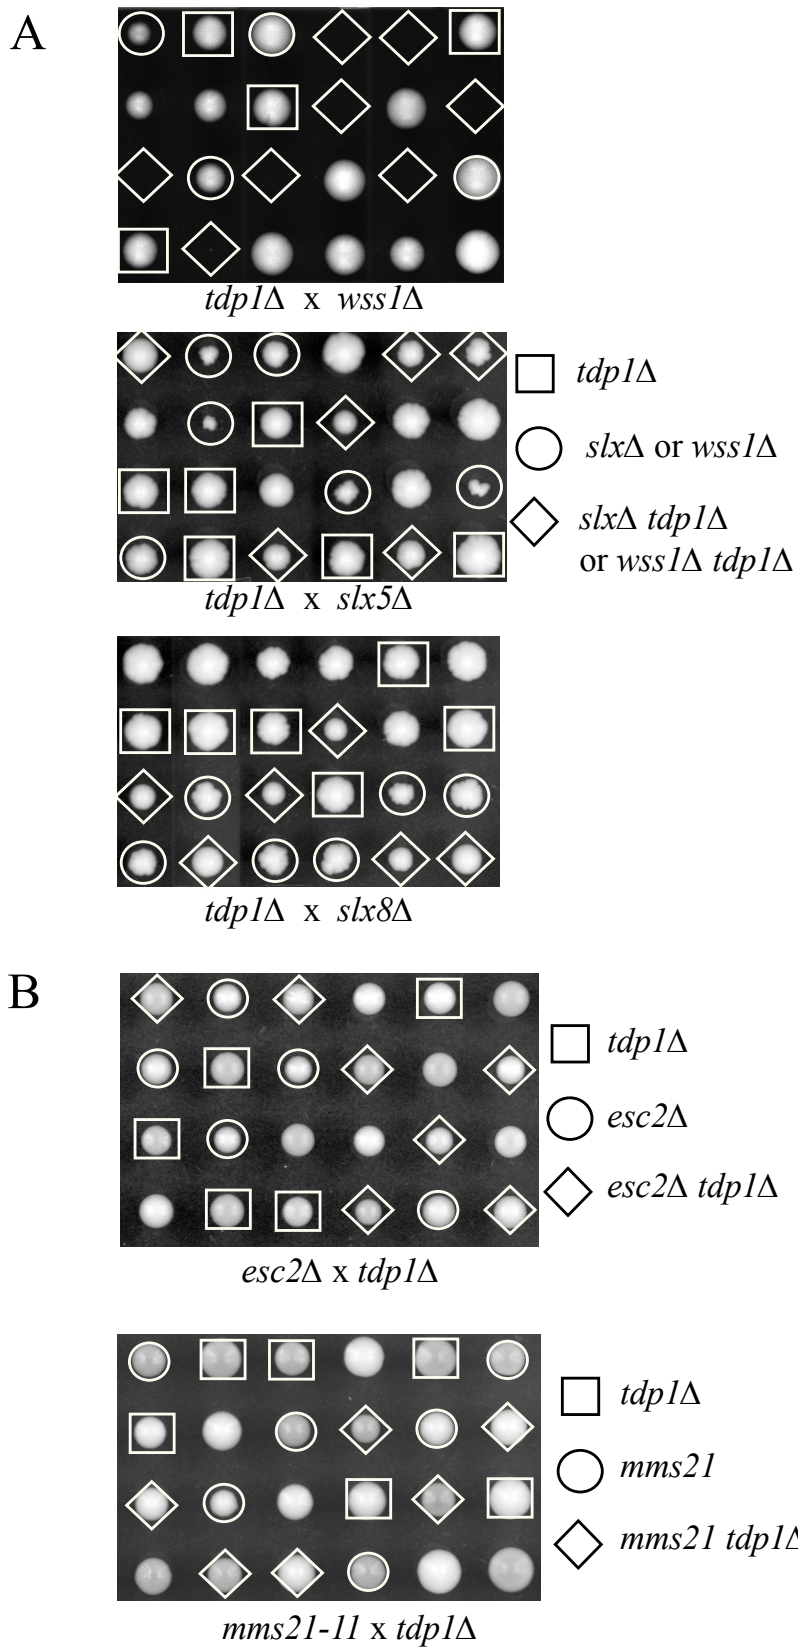

Figure S1

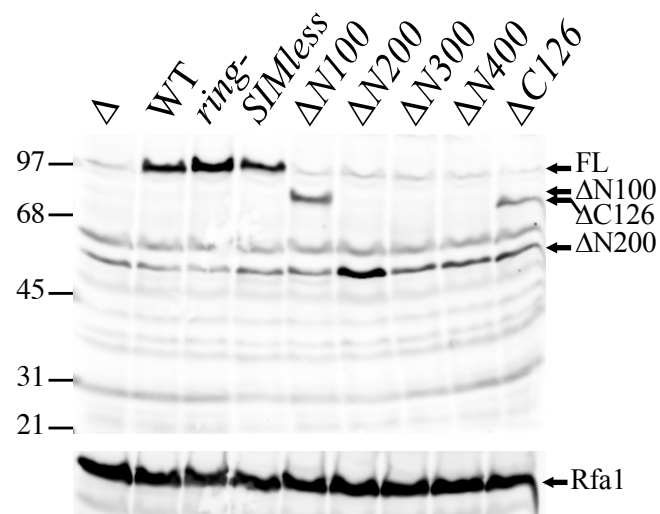

Figure S2

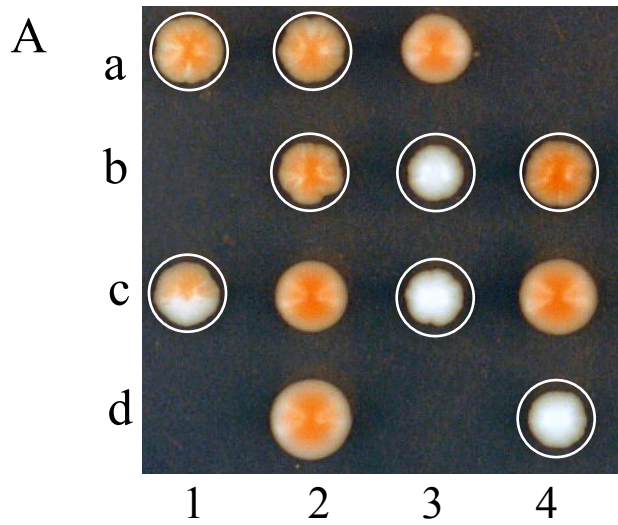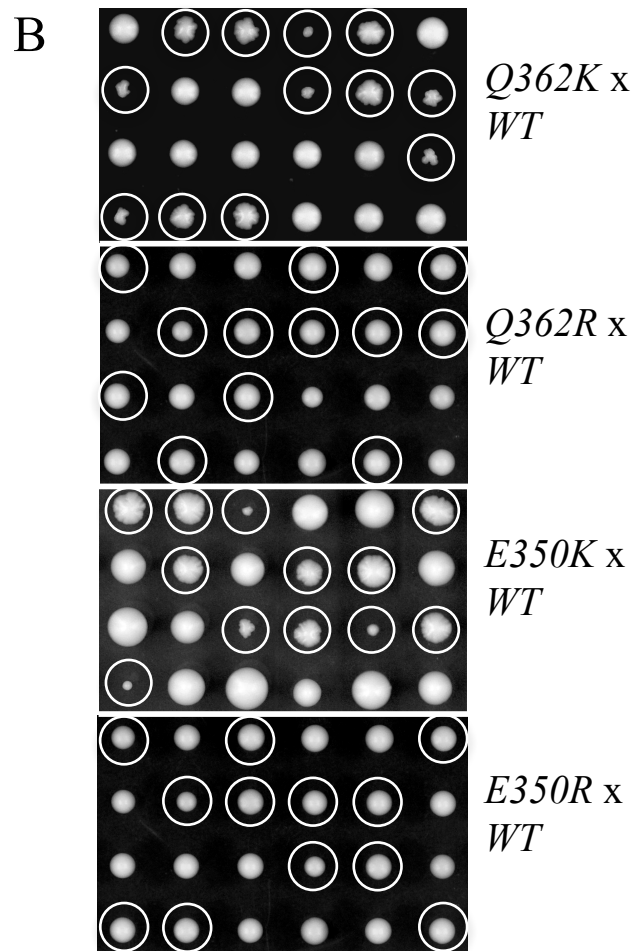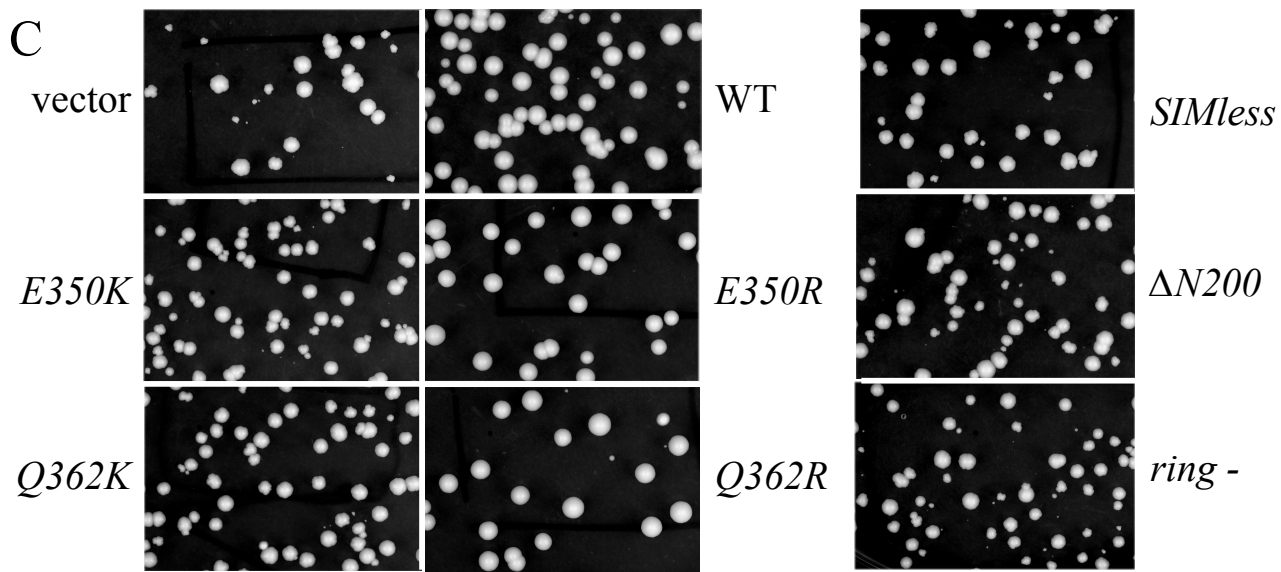

Figure S3

Figure S4

**A. Fungal Slx5 homologs.**

>SceSlx5.619 (*S. cerevisiae*) (398=64%)

MHSDTNGRTKSNNSPNDNPNETVILIDSDKKEEDASIREANLPVRLYPDRRVGRRRDALNRFVRSDSRSRNSQRTHIT  
ASSERPFDQANNDITIFEVGRFFGDDGPIDPSAHYVDLDQEPGSETLETPTIQVDNTNGYLNNDGNNNESDDGLTIV  
EERTTRPRVTLNLPGGERLEVATTTDPIRRSFQEDLGASRRQLRRSATRARNLFVDRSDENEDWTDTHNLP  
AIQRRARRESMRMSRRIAERQRRVQQQRVSSDENISTSIRLQSIRERIQSYTPDIRSAFHRAESLHEFRSILQNVAPITLQ  
ECEEELMALFTEFRNQLLQNWAIQDRVNTQEEALRLHREALERQERTAGRVFHRGTLRESITNYLNFNGEDGFLSRLW  
SGPALSDADEERHTQNIIDMIQEREEERERDVVMK<sup>N</sup>NLMN<sup>K</sup>TRAQQEEFEARAASLPEGYSASFDTTP<sup>K</sup>M<sup>K</sup>LDIT<sup>K</sup>NG<sup>K</sup>E  
ETIIVTDDDLAK<sup>T</sup>LEDIPVCCLCGAELGVGIPDDFTGISQ<sup>K</sup>DRGVSFEGLV<sup>S</sup>K<sup>K</sup>FHCPYQTLARPSMLDRDLS<sup>K</sup>R<sup>T</sup>FIAS  
CGHAF<sup>C</sup>GR<sup>C</sup>CFAR<sup>I</sup>DNAA<sup>K</sup>K<sup>K</sup>S<sup>K</sup>MP<sup>K</sup>K<sup>K</sup>LAQL<sup>K</sup>GSAHPDNYGPK<sup>L</sup>CPADSC<sup>K</sup>L<sup>I</sup>RSR<sup>G</sup>RL<sup>K</sup>EVYF

>CalSlx5.602 (*Candida albicans*) (430=71%)

MNSDNNPTREPGFKRRK<sup>I</sup>EPIER<sup>N</sup>NNNSPQQATSNPGSNDQVIEILSDEETAPPLQSTNTVVHLDTSESDSSLDIDYRD  
DDNNGDANNDVQIVSVNTANPTPLSTPSSNLNHSGVPTNTNTNNNNNNNNRNGEDRDEDDDDDLQILGVRNIYDPNNG  
RLSTPVGDI<sup>P</sup>FVREDNDYTIVEDAPRRNLNPAIARAI<sup>R</sup>RILDMERRYPLPSQEQIRQILMENRPWMQVVSQSEFR<sup>R</sup>RVTF  
DNSAGGGGEEGGGGGGESQPRPQNYHEALQESARRALAEAAAREAAER<sup>A</sup>RENSSRQGENSF<sup>G</sup>FGTPRR<sup>S</sup>YVEL  
TENETSQPVAVPLR<sup>Q</sup>RSVHFTEEARRRGNGGPTFSES<sup>R</sup>DGNIIR<sup>R</sup>RRQPVRYTDSQPFLHNLFPFGAVVHRVPHEL  
RFLGNTFHDVGFALDNLMDSDTPRGFNSAIE<sup>R</sup>SIMQRIEDDTNR<sup>M</sup>MID<sup>R</sup>RIAQETNYN<sup>K</sup>K<sup>T</sup>K<sup>N</sup>EIE<sup>K</sup>K<sup>I</sup>ANQDERHTSNI  
K<sup>S</sup>NENLVCEL<sup>C</sup>NIVL<sup>G</sup>GEGAPDDFK<sup>G</sup>DIRYNE<sup>K</sup>FS<sup>K</sup>YCETYNCQAPWFCVYPFTEVDIELS<sup>K</sup>R<sup>I</sup>FVAK<sup>C</sup>GH<sup>L</sup>FCG<sup>R</sup>CV<sup>K</sup>  
NIGN<sup>R</sup>PK<sup>S</sup>R<sup>K</sup>S<sup>K</sup>TSNANSSTAIEISLNPK<sup>F</sup>YAPSTCPELQ<sup>C</sup>Q<sup>K</sup>FSS<sup>K</sup>SFTEV  
YF

>KlaSlx5.607 (*Kluyvermyces lactis*) (417=69%)

MTEQGCVIEIDSDPELDAQIREEYAPRR<sup>L</sup>LIPD<sup>R</sup>RRNR<sup>R</sup>PRDHLSRFVSN<sup>A</sup>EDRNVAPIAPATDLPVSTDGEDLEITA<sup>E</sup>VSL  
RPDGPINDDAEYINLDNYRASNNGTVVDHREGDDDLMLVEERI<sup>Q</sup>ESGRPVLLQLPAGQTLQVDASWNE<sup>L</sup>PVGR<sup>S</sup>FO  
NQVYRNPNQLRR<sup>L</sup>RRHIDHATAMFMGGYNQSGTGSDSDNDADYIPDIVNER<sup>N</sup>QYTMQTR<sup>M</sup>REQRERQ<sup>N</sup>QMQR  
LQRAA<sup>E</sup>TIDSLD<sup>P</sup>DLR<sup>S</sup>LFESQSLSQFREGLRFNFP<sup>P</sup>ARLEQLLGQYRDFR<sup>A</sup>RAMQSWAEGRR<sup>R</sup>TRMSYQ<sup>N</sup>RNS  
LRPQR<sup>T</sup>RS<sup>G</sup>TQQNHSR<sup>G</sup>SNGDSRD<sup>N</sup>ALYQQMLFGMPDDDENMDGNNFTGTTQSLQR<sup>I</sup>ISNTMNR<sup>R</sup>FGNLPFGV<sup>G</sup>PE  
FGFYEDGDDA<sup>A</sup>NTELIIR<sup>M</sup>IQEREERDASTRT<sup>K</sup>K<sup>L</sup>NEVT<sup>K</sup>SQQQ<sup>K</sup>YID<sup>K</sup>ANSLPEGYSASFNTAPLMSMTMENEGREE  
TVMVTD<sup>V</sup>AAK<sup>T</sup>YIDVPV<sup>C</sup>VLGVELGVGIPDDW<sup>K</sup>GVSEED<sup>K</sup>GV<sup>S</sup>F<sup>E</sup>ALQSHY<sup>K</sup>FHCPYQTLAR<sup>P</sup>TLVDRDLS<sup>R</sup>RYV  
SSCGHTFCGR<sup>C</sup>QV<sup>R</sup>IK<sup>N</sup>AR<sup>D</sup>ISAK<sup>E</sup>K<sup>N</sup>KL<sup>S</sup>NSQGPSHPDNYGPK<sup>K</sup>CPAEGCNSNL<sup>R</sup>K<sup>K</sup>GIMRE<sup>V</sup>YF

>AgoSlx5.557 (*Ashbya gossypii*) (366=66%)

MTDPNAA<sup>R</sup>NAVIEIESDPEEDQRIINQYR<sup>Q</sup>TRLVPD<sup>R</sup>RLNRP<sup>R</sup>DAANRFVSVSGRVAAAAGEGDDEVEIVNEVYLDDEG  
PIDSTADFVDLDEQQGPSSSMVINHDGGDDDDVAIIIEERTTHPTFLNLPNGQTLRISGSVH<sup>D</sup>RPLRRSFETQ<sup>R</sup>TARAN  
MLRR<sup>A</sup>ARSAQR<sup>L</sup>FMNENDGEPSE<sup>R</sup>EASDREYLPQSVLR<sup>Q</sup>RQALMQERLQ<sup>R</sup>QREHARQHEHIADPQVDALAPEL<sup>R</sup>SI  
FYHAETLHEV<sup>R</sup>TMLNASGLGTSAAAMQDLLQLYMQR<sup>S</sup>RQIN<sup>N</sup>WARQRAQEF<sup>R</sup>HGSAREADHAQDD<sup>S</sup>ASR<sup>A</sup>RLN<sup>P</sup>  
ALNAQR<sup>R</sup>NSFTSYV<sup>L</sup>AR<sup>S</sup>LG<sup>G</sup>FGVWPNDFFGDDDEV<sup>T</sup>QNIIDIQAREERDLDSR<sup>K</sup>R<sup>K</sup>YMEDT<sup>K</sup>SQQQAFV<sup>A</sup>RAQ<sup>R</sup>LP  
EGYYASFDPT<sup>P</sup>K<sup>M</sup>K<sup>M</sup>TLE<sup>K</sup>NG<sup>K</sup>TEEVV<sup>V</sup>ADDLAA<sup>K</sup>SYVEVPV<sup>C</sup>CLCGVELGLGIPDDFAGISAVDR<sup>G</sup>V<sup>S</sup>F<sup>E</sup>SLV<sup>S</sup>K<sup>Y</sup>D  
FHCPYQALAHPSIAD<sup>R</sup>DLS<sup>R</sup>K<sup>T</sup>FVAHCGHTFCGR<sup>C</sup>CFARINNA<sup>K</sup>R<sup>F</sup>S<sup>K</sup>ISK<sup>K</sup>BLAELHGSPHPDNYGPR<sup>V</sup>CPAEGC<sup>R</sup>GQ  
LRT<sup>R</sup>G<sup>K</sup>MRE<sup>V</sup>FF

>YliSlx5.332 (*Yarrowia lipolytica*) (179=54%)

MTPQRECDPITVLDDETE<sup>V</sup>VGSTDCIPEASEDPFIVISSDEEDNTNTDTGNYSR<sup>T</sup>PEIIDISDTER<sup>P</sup>DEPEEEEEEDP<sup>R</sup>L  
NMERIFMNSFQQDQHEYLNNFGFFR<sup>Q</sup>PHYPV<sup>R</sup>AE<sup>R</sup>NPNGQPSFSP<sup>R</sup>QFAHYHHFISRLQGIPGLGFGGPNMREDPAF  
EEDLQRAMRASMEDSLSNFGPK<sup>K</sup>VSHPEPPTTTTEGYTRSV<sup>R</sup>K<sup>R</sup>QV<sup>V</sup>CCALCRSDLG<sup>V</sup>GIPPET<sup>K</sup>K<sup>P</sup>S<sup>K</sup>SSSP<sup>K</sup>R<sup>K</sup>  
R<sup>F</sup>S<sup>R</sup>FSDLT<sup>D</sup>VERTLS<sup>K</sup>R<sup>M</sup>FFT<sup>K</sup>CGHVYCGLCVQFI<sup>K</sup>RR<sup>R</sup>TS<sup>R</sup>Q<sup>K</sup>ED<sup>K</sup>SNIN<sup>V</sup>DCITDF<sup>K</sup>GR<sup>Y</sup>VDT<sup>P</sup>PSLIDHC<sup>V</sup>VP<sup>G</sup>  
C<sup>K</sup>E<sup>K</sup>L<sup>P</sup>RS<sup>R</sup>G<sup>K</sup>FF<sup>K</sup>EMFT

>SpRFP1.254 (*S. pombe*) (*Schizosaccharomycetes*) (163=80%)

MQFN<sup>G</sup>SN<sup>G</sup>IDESSVIDL<sup>T</sup>RSPSP<sup>P</sup>VETSISSTNIIDLDAIPDDSFSPSPVLS<sup>P</sup>RRRRMNRRRNERSRN<sup>F</sup>SPSNHLSYLED<sup>M</sup>I  
YLG<sup>P</sup>QVSTRRSSRRDL<sup>M</sup>GMIAR<sup>T</sup>FPEFSSVNSLSPSLFQLIVNR<sup>M</sup>R<sup>F</sup>DAIHPEWTNGSDDEYFSNHFEESYDDFTSSL  
ENIK<sup>Q</sup>SYK<sup>P</sup>PPGPP<sup>K</sup>SG<sup>F</sup>TRSFNNDTLMVCP<sup>R</sup>CQEPLGTS<sup>K</sup>S<sup>K</sup>E<sup>K</sup>SALWAT<sup>K</sup>CGHVYCGSCAK<sup>V</sup>L<sup>K</sup>TS<sup>K</sup>R<sup>S</sup>Q<sup>S</sup>K<sup>L</sup>V  
NDCGR<sup>Y</sup>LNT<sup>K</sup>NAMWELFY

>SpRFP2.205 (S. pombe) (Schizosaccharomycetes) (115=56%)

MNLHGLELPGRDQRLSPEVIDLTEDIEDDGADVSEVTLLDLTRIEFQPRRRIRTSRNHLNANLSNVPTINSIPSPVTRPP  
VAVGGGIFYGARRRTRNSQTQRRTLLENGFRNSRKKAQDSSNSIAERVSPPPGFCYDVHPHNNIACA~~CGNELVSDE~~  
~~KK~~SIFAAK~~CGHLFCSTCAKELRKK~~TVPCPVQHCRKRIT~~KK~~FIFPLYL

>UmaGI71004004.641 (U. maydis) (Ustilaginomycetes) (254=40%)

MTVYGYNRKQGYRNARFGRALRHFCSAQAQVWTEIQPRIELHGLCQIGLIFSIYLIPIPSQCGGVALREASGVAQNPTF  
NWPAKPGASPCVQALFESIINSKLVLFMNSDHPLRPPTVVAGSRPSSRSSSRGRSIASSGHTSRASPAQRRTNSIPRNR  
SAGSSNRTPLRMSRSASQEAGASTTFTDVANSRSEGQTDVHSATNSSDLIVISSDSSDGDQEDDDEFVAQWPEHPVV  
RAPAPPSDFLEVSVRRRAQPLSSTPRAELFSPPPSAGRPAEPIRLSSASEDRRVGVSADPHTGDFLVRPMPIVRPTDST  
AYSDDSGSFSIVSAQLAPSHRPRSDHPITEQRLRALNLMPTKSPPRSKPPPIEHPLLSTYTCPICFDAPTNLVSTPCGH  
FFCGECLFQALKSQAVQRGAMEEEATLYSFGGLFASLVPGATFGAALGGVGAQTASGQVYSGGGPAGSAGGAGRBR  
GGRRGGGGRRGGGSGSRGGSVGGGGGRBKPDPLAGQCPVCRAKIKGAFNGRDKNGIVGLRLTMGTPVNDPRKENG  
QMKSDSVEKNVDLSASDETYDDDEVIFPTSKQAEATAKTDSFESSVADEKSGSPRGPSPVNNASGSTISTSSPMQGR  
CVRTRKRPRRATSDTSAHQTE

## B. Fungal Slx8 homologs.

>SceSlx8.274 (134=49%)

MARRPDNQNPENGLRIKRVRLLESVRQNDEEEENEVSRTQNIIVTDNRHDSPEAVVEIIGERALENTSEEDGDDDLRLF  
RALEEDPGSDHNTSNNDSGNHDRMTEEPEASSGNITLNNVEELHTMDVLSQTANTPSASPMLDAAPPTTKPG  
TNSKEQTVDLTADAIDLDAEEQQVLOISDDD~~FQETKEAPKEYGAAKDYR~~CPICFEPPEALMTLCGHVFCPCPLFQM  
VNSSR~~TCR~~QFGHCALCRSKVYLKDVRLILRKKQVKKKVS

>AgoSlx8.241 (117=49%)

MAGERGGAALGAPLGGDEADGAQAEWNTDGGTQESGASSEAPARKRRRVGRNRQMYDSDSDYDGSPQVA  
VGDSAAGRAAAATARADESGDGSQSSVELADEGSAGGGEEDIVYLEARGPVS~~GVVDVEAEARLQQVVEIPDEE~~VG  
EEQTRLGGDRPVECKKAMDYKCPICFDPPEAALMTPCGHIYCTVCLFQMVNSSR~~GYBR~~NGQCALCRK~~DVKL~~KEVGLV  
VLR~~KKRVR~~KQSAE

>KlaSlx8.279 (96=34%)

MVNEDDSL~~R~~VVSSSDTTDQLQLVPLSMGQSTVRTGEDEDERIVTGRRRRHELQESETDIEEEEEELRRK~~SRR~~ISRTSIV  
SIDDADILSETQHVTEIGDTTEQSNLATAPPQEVSDNEEPAIISTADYGVAYQNVQDQSAEAQDQEEEEEEELHEAVG  
EGDDDDIKVLTEEEQIKAQQVIEIDDEDETEGHKSGKDMSETPLETKK~~AADYV~~CPICMEPPEAALVT~~K~~CGHVFCCTCLY  
GMVNSSK~~GNG~~BRNGLCALC~~RENV~~KLQDLRLIVMR~~KNRIR~~KPN

>YliSlx8.254 (89=35%)

MSSTILFSSRFTRRLSLLTISHTPNQVSPVLKPKQSPFFSPTKHHTKLQTVHRQQVQRQAMSGTPLSVHSSASTPESR  
MLTINDTDTDNSSQPLYIDSGDEETHNVIDLDASDASDYDSNDDDGLDLSAPPPDQHSK~~REV~~KCPICLEPPDR~~LCVTE~~  
CGHLYCGDCVFKALSSGV~~BASDSV~~GECSIC~~RK~~SVVYK~~NNV~~FLET~~RM~~GPLL~~K~~DDDDEYETDSDIEDDR~~NV~~K~~VQ~~KMHES  
LTYDLDEVDTLDTPLSPDA

>CalSlx8.129 (57=44%)

MSTPNVTNISSDDEDEIEVLEFRKLTQDLIDNPTQPEER~~RRIT~~KKLSDVECPICFDEV~~BB~~AITTSCGHVFCLE~~CIE~~RSISS  
HARGQV~~RSSQR~~BRGLCPLCRKQVVF~~K~~ETIPL~~K~~M~~KK~~AE~~K~~ID~~K~~PDLPP~~K~~

>NcaSlx8.263 (160=61%)

MGLRSDGPKDEPEPREKESVKRRRIDNDHHNEATTGVNDEEESIDVLDNDDDSVEIVHENAAPASPEDLLIRALEE  
GLAETPSMEDNLHETNATATPALNTDNTQGQTAENIDESVINSQPVTSTNRTPTGVSAASSVTPR~~V~~LDTS~~SG~~FDPLIEA  
IDLEAAEQQVIQIPDDEIEDEIQRGKKQETYRPVTEYR~~CPIC~~MDPPETALAPCGHVFCDCCLFQMVNSS~~R~~TY~~R~~K~~D~~GH  
ALCR~~K~~EVRLRDVKLILR~~KK~~RI~~KK~~VA

>SpoSlx8.269 (161=60%)

MPPAHK~~R~~DTNVRNLSAPYNIPSQARVAAGNAAINRRR~~SS~~SPVENSPPGNGFPVSEADTDYPSGTTSENE~~SL~~PLNR~~APRS~~  
LREVAS~~EL~~AQEETLPVETSDLNIDVESEVFDLEDINFQNDADDINQ~~R~~F~~T~~YNNHPASVENS~~LT~~NVNSIHAQPTTISD~~M~~DLT  
DETSYDPR~~K~~Q~~K~~FEQ~~G~~KNPSTTNAEIE~~K~~EEPS~~KK~~QVVPSSQR~~LADY~~KCVICLDSPENLSCTPCGHIFCNFCILSALGTTA  
ATQ~~K~~CPVC~~RRK~~VHPNKVICLEMMLGSQ~~KKK~~S

>NcrSlx8.428 (281=66%)

MDDDFPLSDAAYDDIFADLDDLALPPPLSSVAHPNPGVVPVQSLPSLAPLLQQYPAPNPNSNSDNSQIHGQRQQHPHN  
IPGQTTNILHLSLQIPQAPSPANAYITPRTSLPCPHQPQARAEPGRHLDNRQSQAAYLPPASRALPPPRLPPLALSFLLSG  
SSSTPDSRGTSTFDNNDPALNTNLATGSRAPGLFVTPHRSRREPNSDDFLNELASRDFSSPSLPPQTPRHLDLSPS  
RNSCNTMPSRRDESAAEGSRRRSRGTSHNIVSLPTLPPQSSGAPKRKREDGLEIRAHKPKAHVLLSSDDEKDPFGD  
DNFMDVVDLADTEEVPESMRAKPRPKNEIKLSAFQCVICMDNVTGLTVTHCGHLFCSECLHSALTIDPTKBTCPVCRQ  
KIDKAPIGGKWTAKAKGYYPELEKLVTKKSLGKRAAQ

### C. RNF4 homologs.

>HsaRNF4.190 (H. sapiens)(149=78%)

MSTRKRRGGAINSRQAQKRTREATSTPEISLEAEP~~ELVE~~TAGDE~~VDLT~~CESLEPVVVDLTHNDSVVIVDERRRPRRNA  
RRLPQDHADSCVSSDDEELSRDRDVYVTTHTPRNARDEGATGLRPSGTVSCPICMDGYSEIVQNGRLIVSTECGHVE  
CSQCL~~BDSL~~KNANTCPTCRKKINHRYHPIYI

>RnoRNF4.194 (R. norvegicus)(83=43%)

MSTRNPQRKRRGGAVNSRQTQKRTRETTSTPEISLEAEP~~IELVE~~TAGDE~~VDLT~~CESLEPVVVDLTHNDSVVIVEERRR  
PRRNGRRLRQDHADSCVSSDDEELSKDKDVYVTTHTPRSTKDEGTTGLRPSGTVSCPICMDGYSEIVQNGRLIVSTE  
CGHVFC~~CSQCL~~~~BDSL~~KNANTCPTCRKKINHRYHPIYI

>MmuRNF4.194 (M. musculus)(85=44%)

MSTRNPQRKRRGGTVNSRQTQKRTRETTSTPEVSLETEPIELVETVGDEIVDLTCESELPVVVDLTHNDSVVIVEERRR  
PRRNGRRLRQDHADSCVSSDDEELSRDKDVYVTTHTPRSTKDDGATGPRPSGTVSCPICMDGYSEIVQNGRLIVST  
ECGHVFC~~CSQCL~~~~BDSL~~KNANTCPTCRKKINHRYHPIYI

>GgaRNF4.194 (G. gallus)(92=47%)

MSTTPKRRGGANSRQAQKRSRLIASTTEMASEGEPIELEESAGEEVVDLTCESSDPVVVDLTHNDSIVIVEENQRR  
RNLRLRGQRQSDSCVLSSDDEDETRDNDVYVTDKVSRELGPLEDASSKPSGTVSCPICMDGYSEIVQSGRLIVSTK  
CGHVFC~~CSQCL~~~~BDSL~~KNANSCPTCRKKLTHRQYHPIYI

>BtaRNF4.186 (B. taurus)(85=46%)

MSTRKRRGGTVNSRQAQKRTRESTSPPEMALEAEPVELVESAGDEIVDLTCESELPVVVDLTHNDSVVIVEERRRPRR  
NGRRLRQDHADSCVSSDDEELARDKDVYVTTHTSPRSAATGFRPSGTVSCPICMDGYSEIVQNGRLIVSTECGHIFCS  
QCL~~BDSL~~KNANTCPTCRKKMSHKRYHPIYI

>XtrRNF4.190 (X. tropicalis)(92=48%)

MSMAQRKRRKGAEPGHSKSSKRRAPGSTAAMTAATEPIELESAGEEVVDLTCESTEPVVVDLTNNDLSSINDSVVIVEDTP  
RQRRALS~~RPS~~QQTSCVLSSDDEDSRHADHFAANKDISSQAYGSSRSSSGK~~VSC~~PICMDSYSEIVQSGRLIVSTKCGH  
IFCSQCL~~B~~DALKNAPSCPTCRKKLNHKQYHPIYV

>DreRNF4.184 (D. rerio)(123=67%)

MSTTVTQRKRRSTTCSRRGNSKRNRAQMSQVTMETIDVLENDRTNSEDEVVDLTCEGSEPAVVDLTNNDSIVVVEDG  
VQRRVGPCTESYVLSSEEEESSRLSPGLLSSLRDSSRARSTPGAISCPVCM~~DVY~~SEIMDSGRLMVSTKCGHLFCSQ  
CIBDSL~~BAH~~SCPTCRKKLTHKQYHPIYI

>DmeDegringoladeA.319 (D. melanogaster)(248=78%)

MSDSTIFRFNSSILDQSADSNVSSSSSNSSVSDSSVDSHSSIESNSGHNTSVESQSSAESDSSADSHSSLERPSPVERD  
LSVESDSSSATNTSESSVGEASNQLQSPQSNPLNMANLSVSTEDAHSQIRSLTQDVIQMEAE~~ELDRMN~~RYCEEVVAQI  
DTFATRTSTPTT~~RRIRRR~~TSPVEIDL~~SHLD~~RAPPVRSARNRDPDAFIDLCTPEGPR~~SRT~~VNLHSNDSLILP~~RR~~SAEND  
PVVDLDVASPPKRVNRDIDESQKEELYKCPICMDSVSKREPVSTKCGHVFC~~RECIETAIR~~ATHKCPICNKKLTARQFFRI  
YL
